# Supplementary material for: Serum exosomes can restore cellular function in vitro and be used for diagnosis in dysferlinopathy
Source: PubMed Central journal article supplement — Theranostics. 2018 Feb 2;8(5):1243–55. doi: 10.7150/thno.22856 (PMC5835933; doi:10.7150/thno.22856), 2018-02-02
Supplement: thnov08p1243s1.pdf [file thnov08p1243s1.pdf]

## Supplementary Material

### Supplementary Figure 1

**A**

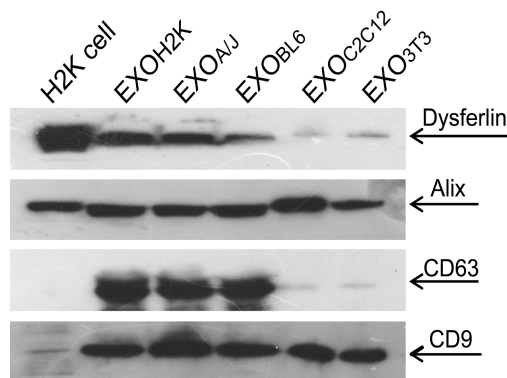

**B**

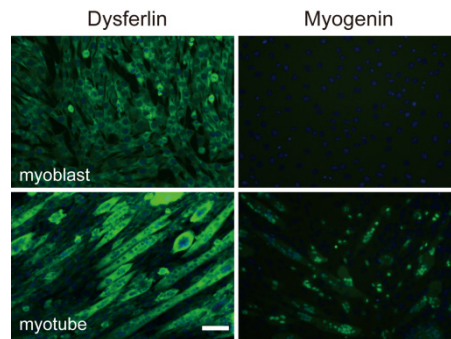

**C**

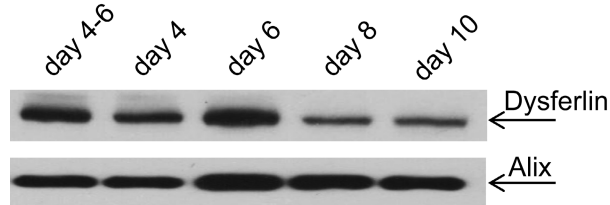

**Supplementary Figure 1. Examination of dysferlin protein in exosomes derived from different murine myoblasts and differentiated myotubes.** (A) Western blot to examine levels of dysferlin protein in exosomes derived from different murine myoblasts. 50 or 100  $\mu$ g total protein from cell lysates or exosomes was loaded. EXO<sub>H2K</sub>, EXO<sub>A/J</sub>, EXO<sub>BL6</sub>, EXO<sub>C2C12</sub> and EXO<sub>3T3</sub> refer to exosomes derived from immortalized H2K, A/J, BL6, C2C12 and 3T3 cells, respectively. H2K cell means immortalized H2K cell lysates. (B) Immunostaining of dysferlin and myogenin in H2K myoblasts and myotubes. Nucleic were counterstained with DAPI (blue) (scale bar =100  $\mu$ m). (C) Western blot to examine levels of dysferlin protein in exosomes derived from differentiated myotubes at different time-points after induction. 20  $\mu$ g total protein from exosomes was loaded and Alix was used as an exosomal marker.

## Supplementary Figure 2

**A**

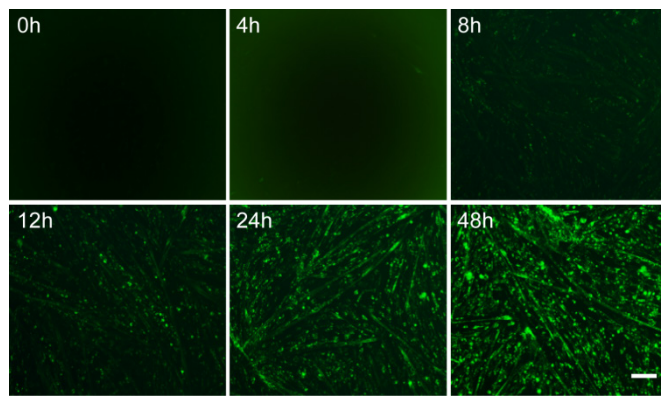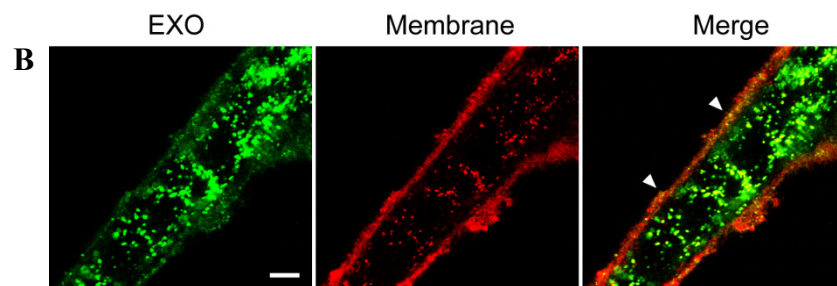

**Supplementary Figure 2. Cellular uptake and localization of PKH67-labelled EXOdysf in murine H2K DYSF<sup>-/-</sup> myotubes.** (A) Cellular uptake of PKH67-labelled EXOdysf in DYSF<sup>-/-</sup> myotubes at different time-points after the addition of 5  $\mu$ g PKH67-labelled EXOdysf (scale bar =40  $\mu$ m). (B) Confocal fluorescence microscopic images to show the localization of PKH67-labelled EXOdysf in DYSF<sup>-/-</sup> myotubes. The membrane dye FM4-64 was used to label membrane (red). Arrowheads point to exosomes localized on the membrane (scale bar =20  $\mu$ m).

### Supplementary Figure 3

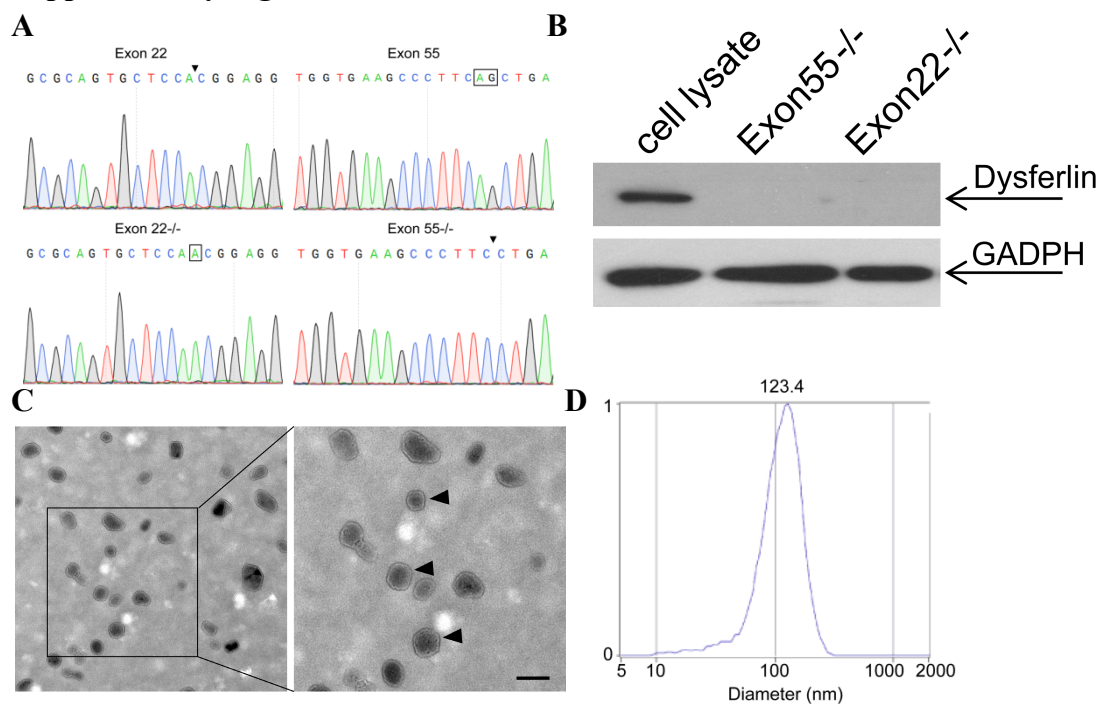

**Supplementary Figure 3. Characterization of human *dysferlin* gene knock-out myoblasts and human serum exosomes.** (A) Gene sequencing for human *dysferlin* gene exon 22 and 55 knock-out myoblasts. (B) Western blot to confirm the expression of dysferlin in human *dysferlin* exon 22 (Exon 22<sup>-/-</sup>) and exon 55 (Exon 55<sup>-/-</sup>). 30  $\mu$ g total protein from cell lysates was loaded and GAPDH was used as a loading control. (C) Representative transmission electron microscopy (TEM) image of exosomes from human serum (scale bar = 100 nm). Arrowheads point to the saucer-cup shape of exosomes. (D) Analysis of size distribution of exosomes from human serum with Nano Particle Tracking and Zeta potential distribution Analyzer (NTA) system.

## Supplementary Figure 4

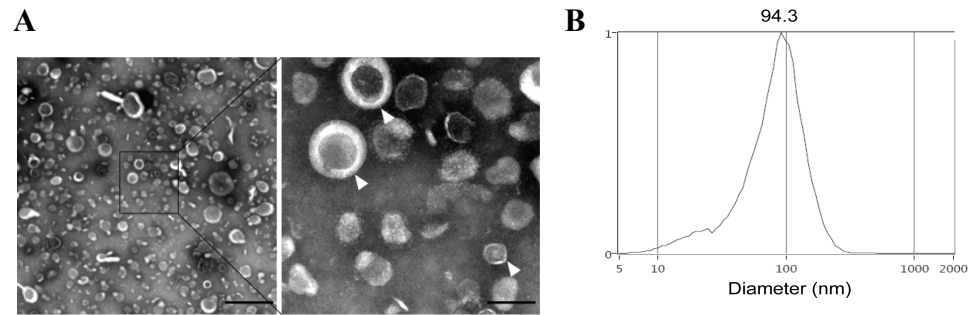

**Supplementary Figure 4. Characterization of exosomes derived from human urine.** (A) Representative TEM images of human urine exosomes (scale bar =500 nm (left) or 100 nm (right)). Arrowheads point to the saucer-cup shape of exosomes. (B) Analysis of size distribution of human urine exosomes with the NTA system.

## Supplementary Figure 5

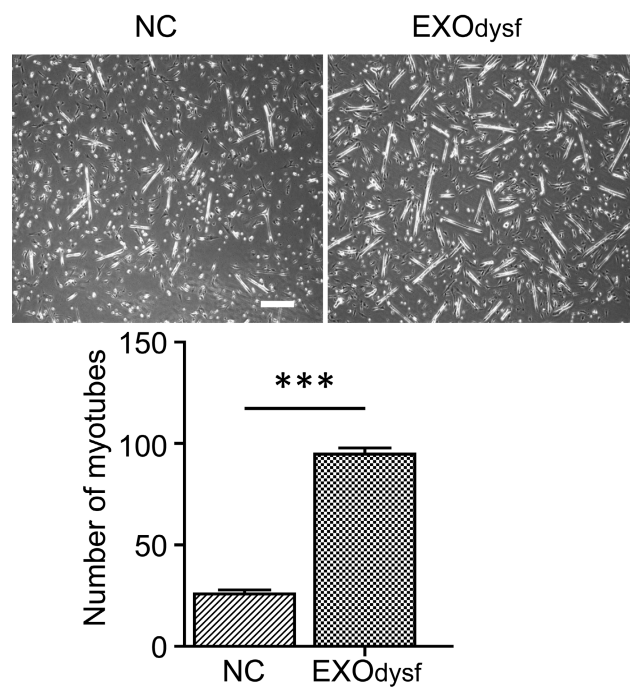

**Supplementary Figure 5. Measurement of myotubes formed in EXOdysf-treated *DYSF*<sup>-/-</sup> myoblasts (EXOdysf).** A significant increase in the number of myotubes formed was observed in EXOdysf-treated *DYSF*<sup>-/-</sup> myoblasts compared to untreated myoblasts (NC) (n=15, two-tailed test, \*\*\*P<0.001) (scale bar = 40  $\mu$ m).
